# Supplementary material for: Conversion of levulinic acid to γ-valerolactone over ultra-thin TiO2 nanosheets decorated with ultrasmall Ru nanoparticle catalysts under mild conditions
Source: Royal Society of Chemistry journal article supplement (doi:10.1039/c8gc03529f), 2019-01-01
Supplement: c8gc03529f1.pdf [file c8gc03529f1.pdf]

**Supporting Information for**

**Conversion of levulinic acid to  $\gamma$ -valerolactone over ultra-thin TiO<sub>2</sub>  
nanosheets decorated with ultrasmall Ru nanoparticle catalysts  
under mild condition**

Shaopeng Li,<sup>ab</sup> Yanyan Wang,<sup>ab</sup> Youdi Yang,<sup>ab</sup> Bingfeng Chen,<sup>a</sup> Jing Tai,<sup>c</sup> Huizhen Liu<sup>\*ab</sup> and Buxing Han<sup>\*ab</sup>

<sup>a</sup>Beijing National Laboratory for Molecular Sciences, CAS Key Laboratory of Colloid and Interface and Thermodynamics Institute of Chemistry, Chinese Academy of Sciences Beijing 100190 (P.R. China) E-mail:liuhz@iccas.ac.cn, hanbx@iccas.ac.cn

<sup>b</sup>University of Chinese Academy of Sciences, Beijing 100049, P. R. China

<sup>c</sup>Testing and Analysis Center, Institute of Chemistry, Chinese Academy of Sciences Beijing 100190 (P.R. China)

## 1. Experimental

### 1.1 Chemicals

**Material** : The reagents Tetra-n-butyl titanate ( $\text{Ti}(\text{OBU})_4$ (TBOT)) (99.0%, AR grade), hydrofluoric acid solution (HF, 40 wt %, AR grade), NaOH (99.9%, AR grade), P25(Degusai, >99%), ethanol (99.8%, AR grade),  $\text{RuCl}_3$ (99.9%, Across Chemicals), and ammonium carbonate (99.9%, AR grade) were bought from Beijing Chemical Reagent Factory.  $\text{H}_2$ (>99.99%) and Ar(>99.99%) were supplied by Beijing Analytical Instrument Company. All the chemicals were used as received without further purification.

### 1.2 Preparation of the catalysts

#### Synthesis of $\text{TiO}_2$ nanosheets ( $\text{TiO}_2\text{-n}$ )

$\text{TiO}_2$  nanosheets with exposed different ratios (001) facets were prepared by the hydrothermal method similar to that reported by Xie.<sup>1</sup> In a typical experimental procedure, 25 mL of  $\text{Ti}(\text{OC}_4\text{H}_9)_4$  and 4 mL of hydrofluoric acid solution (with a concentration ca. 40 wt %) were mixed in a dried Teflon autoclave with a capacity of 100 mL at ambient temperature, followed by hydrothermal treatment of the mixture at 180 °C for 24 h. After being cooled to room temperature, the white precipitate was separated by high-speed centrifugation, washed with ethanol and distilled water for three times, and then dried in an oven at 70 °C for 6 h. 1 g of the  $\text{TiO}_2$  was dispersed in 10 mL of 0.5 M NaOH aqueous solution under vigorous shaking for 30 min in an ultrasonic cleaner and then by high-speed centrifugation, washed with ethanol and distilled water for three times, and then dried in an oven at 70 °C for 6 h.

#### Synthesis of $\text{TiO}_2$ decanodron ( $\text{TiO}_2\text{-d}$ )

Firstly, potassium titanate nanowires (PTNWS) were prepared at 200 °C over 24 h under hydrothermal conditions with a high concentration KOH solution and P25 and according to the literature method. Then  $\text{TiO}_2$  decanodron were prepared by means of a facial hydrothermal route and by using potassium titanate nanowires as a precursor and hexamethylenetetramine as a shape regulator. In a typical experiment, 10 mg potassium titanate nanowires and 133 mg hexamethylenetetramine were dispersed in distilled water under intense ultrasonic treatment.

The resulting solution was then transferred into a 25 mL Teflon-lined stainless-steel autoclave and was kept at 200 °C for 12 h. After being cooled to room temperature, the white precipitate was separated by high-speed centrifugation, washed with ethanol and distilled water for three times, and then dried in an oven at 70 °C for 6 h.

#### **Synthesis of TiO<sub>2</sub> octahedron (TiO<sub>2</sub>-o)**

The preparation method of TiO<sub>2</sub>-o was similar to TiO<sub>2</sub>-d, in a typical experiment, 10 mg potassium titanate nanowires was dispersed in distilled water under intense ultrasonic treatment. The resulting solution was then transferred into a 25 mL Teflon-lined stainless-steel autoclave and was kept at 200 °C for 12 h. After being cooled to room temperature, the white precipitate was separated by high-speed centrifugation, washed with ethanol and distilled water for three times, and then dried in an oven at 70 °C for 6 h.

#### **Synthesis of Ru/TiO<sub>2</sub>-x**

The Ru/TiO<sub>2</sub>-x (Ru/TiO<sub>2</sub>-n, Ru/TiO<sub>2</sub>-d and Ru/TiO<sub>2</sub>-o) catalysts were prepared by impregnation reduction of the above-prepared TiO<sub>2</sub> powders (200 mg) into a clean beaker, which contained 50 mL of deionized water were mixed with appropriate amount of RuCl<sub>3</sub> solution, vigorously stirred and ultrasonic for another 1 h to disperse them completely. Under the ice bath, the NaBH<sub>4</sub> (freshly prepared) was added drop-wise into the solution with a continuous magnetic stirring, the reaction solution kept on stirring for 3 h to complete the reduction reaction. The obtained black granules washed with deionized water and dried in a vacuum oven at 70 °C for 6 h. For comparison, the commercial TiO<sub>2</sub>(Ru/TiO<sub>2</sub>-com.) was also prepared using the same method.

### **1.3 Characterizations**

The scanning electron microscopy (SEM) measurements were performed on a Hitachi S-4800 scanning electron microscope operated at 15 kV. The TEM and EDS images of the catalysts were obtained using a JEOL-2100F electron microscope operated at 120 kV. The XPS spectra were obtained using an ESCALab 220I-XL electron spectrometer (VG Scientific) using 300 W Al K $\alpha$  radiation with a hemispherical energy analyser. The binding energies were calibrated with the

C1s level of adventitious carbon at 284.8 eV as the internal standard reference. Identification of the products was conducted GC/MS analysis on Agilent 7890B GC+5977 MSD. The quantitative analysis of the samples was carried out using an Agilent 4890 gas chromatography equipped with a flame ionization detector (FID) and a HP-5 capillary column (30 m × 0.25 mm × 0.25 μm), Agilent Technologies Singapore (Sales) Pte Ltd., Singapore. The contents of Ru in the catalysts were analysed by ICP-AES (VISTA-MPX), rf power 1.15 kw, coolant gas flow rate 15 L/min, nebulizer gas flow rate 0.75 L/min, sampling depth 12 mm, auxiliary gas flow rate 1.5 L/min.

#### **1.4 Activity tests**

The reaction was carried out in a Teflon-lined stainless steel reactor of 16 mL, which was similar to that used previously. In a typical experiment, 1.0 mmol substrate, 2 mL solvent and the desired amount of catalyst were added into the reactor. The air in the reactor was purged with H<sub>2</sub> for 3 times. Then, the reactor was placed in an air bath of desired temperature, and H<sub>2</sub> was charged to desired pressure. After a certain reaction time, the autoclave was placed in an ice-water mixture and the reaction solution was centrifuged using n-propanol as an internal standard.

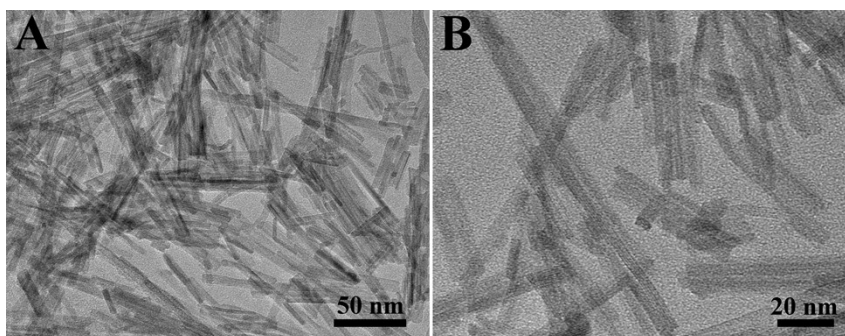

Fig. S1 (A, B) TEM images with different magnifications of PTNWS.

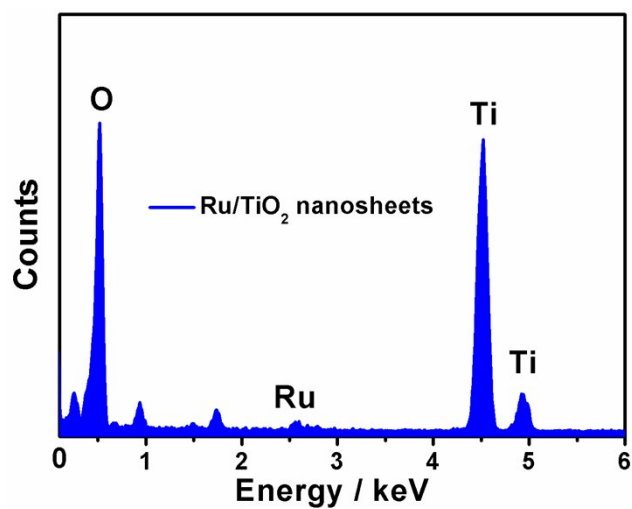

Fig. S2 EDX patterns of as-prepared Ru/TiO<sub>2</sub> nanosheets.

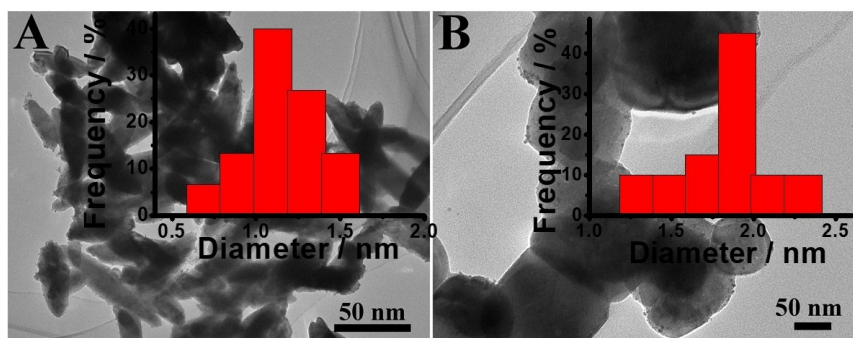

Fig. S3 (A) TEM images of Ru/TiO<sub>2</sub>-o; (B) TEM images of Ru/TiO<sub>2</sub>-d.

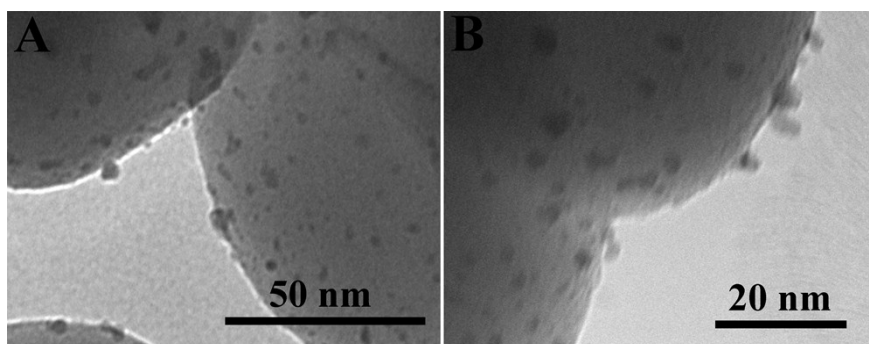

Fig. S4 (A, B) TEM images of Ru/TiO<sub>2</sub>-com. with different magnifications.

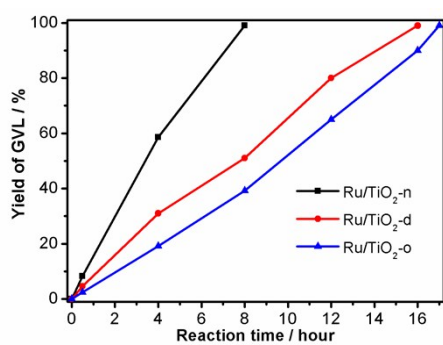

Fig. S5 Plots of yield of LA toward GVL against reaction time with Ru/TiO<sub>2</sub>-x (Ru/TiO<sub>2</sub>-n, Ru/TiO<sub>2</sub>-d and Ru/TiO<sub>2</sub>-o) as the catalyst

**Table S1.** The inductively coupled plasma mass spectrometry of

Ru/TiO<sub>2</sub>-x (TiO<sub>2</sub>-n, TiO<sub>2</sub>-d and TiO<sub>2</sub>-o)

| Entry | Sample                 | Ru content |
|-------|------------------------|------------|
| 1     | Ru/TiO <sub>2</sub> -n | 2.02%      |
| 2     | Ru/TiO <sub>2</sub> -d | 1.98%      |
| 3     | Ru/TiO <sub>2</sub> -o | 1.90%      |

**References:**

1. X. Han, Q. Kuang, M. Jin, Z. Xie and L. Zheng, *Journal of the American Chemical Society*, 2009, **131**, 3152-3153.
